# Supplementary material
Source: publisher site journal article supplement (https://www.dovepress.com/article/206640)
Supplement: Supplementary file 1 [file get_supplementary_file.php]

## List of contents in supplement

1. Table S1: Variable values of Participants.

2. Table S2: Summary of attribute values of participants.

3. Method S3: R computer language scripts

**Table S1: Values of metabolic attributes of 447 patients**

| No. | Sex | Age | Height | Weight | BMI  | SBP | DBP | TC   | HDL-C | LDL-C | TG   | HbA1c | FBG  | FINS  | HOM A-IR |
|-----|-----|-----|--------|--------|------|-----|-----|------|-------|-------|------|-------|------|-------|----------|
| 1   | F   | 22  | 171    | 88.8   | 30.5 | 124 | 70  |      |       |       |      | 5     | 4.24 | 10.45 | 1.97     |
| 2   | M   | 24  | 170    | 80     | 27.7 | 120 | 80  | 5.26 | 1.66  | 2.97  | 0.78 |       | 4.89 | 13.15 | 2.86     |
| 3   | M   | 42  | 175    | 91.6   | 30.1 | 120 | 85  | 5.83 | 0.98  | 3.66  | 2.46 | 5.5   | 4.98 | 14.2  | 3.14     |
| 4   | M   | 20  | 180    | 127    | 39.2 | 149 | 90  | 6.9  | 1.21  | 4.39  | 2.35 | 5.3   | 4.47 | 75.73 | 15.05    |
| 5   | F   | 33  | 155    | 80.5   | 33.5 | 128 | 75  | 6    | 1.22  | 3.74  | 2.1  | 5.2   | 4.77 | 23.86 | 5.06     |
| 6   | F   | 38  | 174    | 104.8  | 34.8 | 124 | 78  | 4.33 | 1.15  | 2.51  | 1.45 | 5.4   | 5.22 | 52.59 | 12.20    |
| 7   | M   | 36  | 173    | 91.2   | 30.5 | 129 | 94  | 4.44 | 0.99  | 2.82  | 1.89 | 5.8   | 5.13 | 19.12 | 4.36     |
| 8   | M   | 31  | 184    | 136    | 40.2 | 127 | 87  | 5.37 | 0.97  | 3.25  | 1.57 | 5.6   | 5.4  | 33.33 | 8.00     |
| 9   | M   | 20  | 183    | 105.2  | 31.4 | 141 | 77  | 4.83 | 1.04  | 2.98  | 1.7  | 5.1   | 4.61 | 20.39 | 4.18     |
| 10  | F   | 36  | 157    | 79.5   | 32.3 | 111 | 75  | 5.06 | 1.11  | 3.16  | 1.23 | 5.8   | 4.99 | 22.7  | 5.03     |
| 11  | F   | 48  | 152    | 71.4   | 31.0 | 125 | 80  | 5.36 | 1.61  | 3.22  | 0.62 | 5.8   | 4.51 | 13.13 | 2.63     |
| 12  | M   | 29  | 171    | 91.8   | 31.4 | 128 | 98  | 4.82 | 0.98  | 2.77  | 3.57 | 5.8   | 5.06 | 31.13 | 7.00     |
| 13  | M   | 31  | 173    | 95     | 31.7 | 140 | 100 | 5.84 | 0.98  | 3.37  | 3.55 | 5.6   | 5.23 | 12.56 | 2.92     |
| 14  | M   | 26  | 178    | 103.5  | 32.7 | 124 | 72  | 5.68 | 1.11  | 3.82  | 2.79 | 5.3   | 5.38 | 27.42 | 6.56     |
| 15  | M   | 40  | 163    | 72.5   | 27.5 | 146 | 91  | 5.3  | 0.89  | 2.5   | 4.19 | 5     | 4.51 | 8.87  | 1.78     |
| 16  | F   | 45  | 158    | 92     | 36.9 | 135 | 85  | 5.65 | 0.68  | 4.38  | 1.77 | 6.5   | 5.85 | 30.34 | 7.89     |
| 17  | F   | 44  | 159    | 95     | 37.6 | 132 | 85  | 5.85 | 0.87  | 3.9   | 2.93 | 6.1   | 7.74 | 38.15 | 13.12    |
| 18  | F   | 18  | 165    | 100.4  | 36.9 | 110 | 80  | 5.48 | 1.11  | 3.74  | 1.23 | 5.9   | 5.21 | 22.45 | 5.20     |
| 19  | F   | 30  | 175    | 82.5   | 26.9 | 148 | 93  | 4.64 | 0.9   | 3.09  | 1.58 | 5.7   | 5.11 | 13.93 | 3.16     |
| 20  | F   | 32  | 164    | 79.1   | 29.4 | 121 | 81  | 6.12 | 1.37  | 4.07  | 1.38 | 5.4   | 5.24 | 24.54 | 5.72     |
| 21  | F   | 49  | 152    | 98.4   | 42.6 | 150 | 95  | 5.12 | 1.35  | 2.65  | 1.86 | 5.8   | 5.58 | 15.06 | 3.73     |
| 22  | F   | 30  | 162    | 77.8   | 29.6 | 110 | 68  | 5.43 | 0.77  | 3.6   | 2.64 | 5.6   | 5.24 | 26.14 | 6.09     |
| 23  | F   | 29  | 163    | 82.4   | 31.0 | 120 | 70  | 5.4  | 0.8   | 2.5   | 2.1  | 5.3   | 4.98 | 37.86 | 8.38     |
| 24  | F   | 33  | 161    | 83     | 32.0 | 127 | 73  | 4.68 | 1.04  | 2.56  | 3.19 | 5.6   | 4.8  | 40.73 | 8.69     |
| 25  | M   | 42  | 165    | 92.7   | 34.0 | 157 | 95  | 5.9  | 0.91  | 3.69  | 3.24 | 5.9   | 5.72 | 25.89 | 6.58     |
| 26  | F   | 31  | 163    | 80     | 30.1 | 151 | 100 | 4.98 | 1.03  | 2.37  | 4.12 | 5.5   | 5.66 | 20.65 | 5.19     |
| 27  | M   | 46  | 180    | 105.2  | 32.5 | 111 | 76  | 6.17 | 1.12  | 3.91  | 2.63 | 5.6   | 5.42 | 15.63 | 3.77     |

|    |   |    |     |       |      |     |     |      |      |      |      |      |       |       |       |
|----|---|----|-----|-------|------|-----|-----|------|------|------|------|------|-------|-------|-------|
| 28 | M | 21 | 173 | 88.7  | 29.6 | 132 | 80  | 3.67 | 0.97 | 2.29 | 0.96 | 5.3  | 4.86  | 13.86 | 2.99  |
| 29 | F | 45 | 154 | 65.1  | 27.4 | 137 | 89  | 4.52 | 1.43 | 2.58 | 0.61 | 4.9  | 4.84  | 6.03  | 1.30  |
| 30 | M | 46 | 171 | 90.4  | 30.9 | 145 | 99  | 5.39 | 0.91 | 3.78 | 1.97 | 5.6  | 5.26  | 10.3  | 2.41  |
| 31 | F | 46 | 162 | 74    | 28.4 | 130 | 89  | 5.67 | 1.19 | 3.71 | 1.23 | 5.2  | 5.46  | 11.3  | 2.74  |
| 32 | F | 25 | 153 | 66.4  | 28.4 | 128 | 84  | 4.56 | 1.31 | 2.84 | 0.61 | 5.5  | 4.72  | 12.41 | 2.60  |
| 33 | F | 38 | 167 | 81.5  | 29.2 | 136 | 90  | 5.56 | 1.06 | 3.7  | 2.13 | 5.3  | 5.54  | 22.79 | 5.61  |
| 34 | M | 31 | 177 | 146.8 | 46.9 | 125 | 83  | 4.55 | 0.84 | 2.98 | 2.52 | 6.1  | 5.72  | 53.92 | 13.71 |
| 35 | F | 46 | 156 | 69    | 28.4 | 113 | 63  | 4.75 | 1.21 | 2.87 | 0.96 | 5.7  | 5.73  | 27.4  | 6.98  |
| 36 | F | 29 | 155 | 73.6  | 30.6 | 122 | 67  | 6.38 | 1.87 | 3.68 | 0.42 | 4.8  | 4.33  | 3.69  | 0.71  |
| 37 | M | 36 | 175 | 96.9  | 31.6 | 135 | 92  | 6.1  | 1.08 | 4.16 | 1.55 | 5.5  | 6.26  | 36.64 | 10.19 |
| 38 | F | 33 | 160 | 112   | 43.8 | 149 | 101 | 5.63 | 0.92 | 3.64 | 2.45 | 5.5  | 5.12  | 38.73 | 8.81  |
| 39 | F | 52 | 174 | 97.5  | 32.4 | 138 | 81  | 5.75 | 1.03 | 3.62 | 1.83 | 6.1  | 5.77  | 11.02 | 2.83  |
| 40 | M | 19 | 170 | 142.9 | 49.4 | 117 | 86  | 5.44 | 0.88 | 3.74 | 2.13 | 5.4  | 5.17  | 57.01 | 13.10 |
| 41 | F | 33 | 163 | 77    | 29.0 | 134 | 89  | 4.34 | 1.01 | 2.9  | 0.94 | 5.2  | 4.81  | 15.64 | 3.34  |
| 42 | F | 32 | 165 | 75.5  | 27.9 | 127 | 82  | 5.28 | 0.93 | 3.74 | 1.7  | 5.1  | 4.59  | 11.48 | 2.34  |
| 43 | F | 32 | 161 | 86    | 33.2 | 121 | 75  | 5.89 | 0.88 | 4.01 | 2.79 | 5.3  | 5.53  | 14.47 | 3.56  |
| 44 | F | 44 | 145 | 78.7  | 37.4 | 159 | 88  | 3.26 | 0.79 | 2.02 | 1.09 | 6.9  | 5.79  |       |       |
| 45 | F | 26 | 153 | 75    | 32.0 | 117 | 85  | 4.13 | 1.12 | 2.56 | 0.74 | 6.2  | 6.26  | 22.72 | 6.32  |
| 46 | M | 24 | 180 | 97.5  | 30.1 | 118 | 74  | 6.99 | 0.93 | 5.29 | 1.75 | 5.4  | 5.05  | 20.74 | 4.65  |
| 47 | F | 28 | 161 | 101.5 | 39.2 | 128 | 90  | 6.24 | 1.05 | 4.62 | 1.46 | 5.9  | 5.86  | 37.91 | 9.87  |
| 48 | M | 32 | 178 | 122   | 38.5 | 140 | 90  | 6.61 | 0.85 | 4.55 | 2.58 | 10.9 | 14.49 |       |       |
| 49 | F | 28 | 159 | 73.9  | 29.2 | 130 | 89  | 3.72 | 0.69 | 2.32 | 2.26 |      | 5.33  |       |       |
| 50 | M | 25 | 186 | 123   | 35.6 |     |     | 4.81 | 0.92 | 3.08 | 2.35 | 4.8  | 4.89  | 16.41 | 3.57  |
| 51 | M | 26 | 180 | 125.8 | 38.8 | 120 | 70  | 5.14 | 0.91 | 3.63 | 1.77 | 5.3  | 8.04  | 13.86 | 4.95  |
| 52 | M | 43 | 170 | 90    | 31.1 | 130 | 100 | 5.62 | 1.35 | 3.61 | 1.52 | 6.7  | 8.48  | 20.14 | 7.59  |
| 53 | F | 37 | 172 | 113   | 38.2 | 120 | 70  | 3.61 | 1.06 | 2.22 | 0.72 | 4.8  | 4.91  | 31.42 | 6.86  |
| 54 | F | 55 | 167 | 88    | 31.6 | 130 | 70  | 6.41 | 1.32 | 4.13 | 1.22 | 5.9  | 6.84  | 15.34 | 4.66  |
| 55 | F | 34 | 162 | 83.4  | 31.8 | 110 | 70  | 5.35 | 1.19 | 3.47 | 1.35 |      | 5.33  | 33.82 | 8.01  |
| 56 | F | 24 | 160 | 92    | 35.9 | 131 | 80  | 6.24 | 1.44 | 3.98 | 1.66 | 5.9  | 5.74  | 17.07 | 4.35  |
| 57 | F | 29 | 158 | 81    | 32.5 | 135 | 82  |      |      |      |      | 5.6  | 5.46  | 18.73 | 4.55  |
| 58 | M | 34 | 178 | 91    | 28.7 | 154 | 108 | 5.02 | 1.02 | 3.19 | 2.9  | 4.4  | 5.53  | 15.22 | 3.74  |
| 59 | F | 39 | 163 | 75    | 28.2 | 120 | 74  | 5.94 | 1.12 | 3.97 | 1.62 | 5.2  | 5.24  | 33.58 | 7.82  |
| 60 | F | 71 | 150 | 86    | 38.2 | 160 | 95  | 5.77 | 1.62 | 3.45 | 1.16 | 6.4  | 6.42  | 21.71 | 6.19  |
| 61 | M | 46 | 175 | 83    | 27.1 | 128 | 88  | 4.78 | 0.97 | 3.08 | 1.8  | 4.6  | 5.04  | 42.63 | 9.55  |
| 62 | F | 34 | 160 | 69    | 27.0 | 123 | 68  | 5.92 | 1.4  | 3.69 | 1.8  | 5.1  | 5.41  | 38.42 | 9.24  |
| 63 | M | 35 | 183 | 110   | 32.9 | 138 | 86  | 4.66 | 1.04 | 2.94 | 1    | 5.6  | 5.71  | 17.14 | 4.35  |
| 64 | M | 30 | 172 | 101   | 34.1 | 121 | 80  | 5.23 | 1.3  | 3.32 | 0.72 | 5.4  | 5.41  | 18.59 | 4.47  |
| 65 | F | 24 | 168 | 107   | 38.1 | 131 | 72  | 4.09 | 0.84 | 2.63 | 1.06 | 6.1  | 5.74  | 50.89 | 12.98 |
| 66 | M | 43 | 173 | 104.6 | 34.9 | 136 | 92  | 6.5  | 1.05 | 3.52 | 6.58 | 5.9  | 6.55  | 50.94 | 14.83 |
| 67 | M | 32 | 175 | 100   | 32.7 | 136 | 96  | 4.5  | 1.2  | 2.76 | 0.72 | 5.5  | 5.1   | 21.59 | 4.89  |
| 68 | F | 67 | 165 | 93.8  | 34.5 | 163 | 98  | 5.59 | 1.11 | 3.41 | 1.66 |      | 5.28  | 26.91 | 6.31  |
| 69 | M | 26 | 168 | 76.5  | 27.1 | 120 | 70  | 5.86 | 1.33 | 3.74 | 0.79 | 5.1  | 4.87  | 15.76 | 3.41  |
| 70 | F | 30 | 156 | 76    | 31.2 | 120 | 70  | 4.34 | 1.19 | 2.63 | 1.02 | 5.5  | 5.34  | 11.06 | 2.62  |

|     |   |    |     |       |      |     |     |      |      |      |           |     |      |       |       |
|-----|---|----|-----|-------|------|-----|-----|------|------|------|-----------|-----|------|-------|-------|
| 71  | M | 37 | 170 | 100   | 34.6 | 124 | 89  | 5.79 | 0.9  | 4.07 | 0.89      | 9.5 | 7.73 | 8.86  | 3.04  |
| 72  | F | 39 | 160 | 125.8 | 49.1 | 164 | 88  | 4.52 | 1.2  | 2.59 | 1.64      | 5.9 | 6.74 | 19.54 | 5.85  |
| 73  | F | 33 | 160 | 80.5  | 31.4 | 110 | 70  | 6.53 | 1.14 | 4.39 | 1.86      | 5.6 | 5.69 | 32.06 | 8.11  |
| 74  | F | 42 | 160 | 85    | 33.2 | 124 | 75  | 4.66 | 1.22 | 2.79 | 1.99      | 6.2 | 5.57 | 26.6  | 6.58  |
| 75  | F | 35 | 160 | 67.2  | 26.3 | 120 | 70  | 4.39 | 1.4  | 2.53 | 0.74      | 5.6 | 5.36 | 12.82 | 3.05  |
| 76  | F | 23 | 164 | 118.8 | 44.2 |     |     | 6.05 | 1.31 | 3.79 | 1.65      | 5.4 | 5.49 | 70.08 | 17.10 |
| 77  | F | 31 | 165 | 79    | 29.0 | 117 | 80  | 6.05 | 1.21 | 3.62 | 3.97      | 5.7 | 7.1  |       |       |
| 78  | F | 19 | 160 | 71    | 27.7 | 119 | 80  | 4.56 | 1.55 | 2.56 | 0.66      | 5.1 | 5.18 | 15.7  | 3.61  |
| 79  | F | 26 | 160 | 117   | 45.7 | 156 | 88  | 4.55 | 1.2  | 2.74 | 1.05      | 5.9 | 5.67 | 32.02 | 8.07  |
| 80  | M | 34 | 173 | 126   | 42.1 | 140 | 70  | 5.26 | 0.96 | 3.26 | 2.67      | 7.2 | 6.33 | 23.43 | 6.59  |
| 81  | M | 30 | 180 | 129.3 | 39.9 | 119 | 68  | 4.62 | 0.79 | 3.1  | 1.45      | 5.3 | 6.43 | 54.69 | 15.63 |
| 82  | M | 18 | 186 | 122.2 | 35.3 | 136 | 64  | 6.29 | 1.17 | 3.98 | 1         | 5.6 | 5.27 | 20.01 | 4.69  |
| 83  | F | 18 | 165 | 82.6  | 30.3 | 125 | 81  | 4.5  | 1.25 | 2.78 | 0.85      | 5.4 | 4.95 | 18.69 | 4.11  |
| 84  | M | 25 | 183 | 130.7 | 39.0 | 130 | 75  | 5.15 | 1.07 | 3.17 | 1.88      | 5.7 | 5.67 | 56.53 | 14.25 |
| 85  | F | 28 | 164 | 98    | 36.4 | 125 | 93  | 6.16 | 1.15 | 3.62 | 3.37      | 5.9 | 6.15 | 50.31 | 13.75 |
| 86  | F | 31 | 166 | 84    | 30.5 | 120 | 70  | 3.72 | 1.2  | 2.11 | 0.99      | 5.1 | 4.57 | 14.39 | 2.92  |
| 87  | M | 19 | 180 | 105.4 | 32.5 | 119 | 67  | 4.6  | 1.44 | 2.48 | 1.2       | 5.8 | 5.47 | 18.21 | 4.43  |
| 88  | F | 34 | 167 | 81    | 29.0 | 120 | 70  | 4.86 | 1.33 | 2.86 | 0.85      | 5.9 | 6.14 |       |       |
| 89  | M | 33 | 172 | 111   | 37.5 | 135 | 99  | 6.28 | 1.05 | 3.71 | 4.89      | 7.7 | 9.14 | 56.26 | 22.85 |
| 90  | F | 38 | 159 | 100.4 | 39.7 | 150 | 99  | 5.82 | 1.17 | 3.47 | 2.78      | 7.3 | 7.66 | 30.4  | 10.35 |
| 91  | M | 28 | 162 | 93    | 35.4 | 120 | 70  | 3.45 | 0.74 | 2.12 | 1.74      | 5.4 | 4.77 | 37.73 | 8.00  |
| 92  | F | 29 | 160 | 92    | 35.9 | 139 | 89  | 5.41 | 1.17 | 3.45 | 2.01      | 5.2 | 5.03 | 52.85 | 11.81 |
| 93  | F | 28 | 155 | 70    | 29.1 | 144 | 83  | 7.44 | 1.26 | 4.61 | 2.34      | 6.1 | 7.89 | 23.11 | 8.10  |
| 94  | F | 31 | 158 | 80    | 32.0 | 118 | 79  | 5.23 | 1.15 | 3.16 | 1.02      | 5.3 | 5.6  | 30.17 | 7.51  |
| 95  | F | 28 | 155 | 72    | 30.0 | 140 | 92  | 7.01 | 1.16 | 4.4  | 3.37      | 5.6 | 5.48 | 18    | 4.38  |
| 96  | F | 34 | 170 | 96    | 33.2 | 127 | 70  | 5.65 | 1.34 | 3.59 | 1.62      | 5.4 | 5.91 | 35.99 | 9.45  |
| 97  | F | 34 | 159 | 81    | 32.0 | 121 | 83  | 5.06 | 1.31 | 3.17 | 1.48      |     | 5.42 | 18.16 | 4.37  |
| 98  | F | 29 | 168 | 104   | 36.9 | 158 | 112 | 7.33 | 1.38 | 4.62 | 2.84      | 5.7 | 6.05 | 39.46 | 10.61 |
| 99  | F | 38 | 160 | 73.5  | 28.7 | 128 | 80  | 5.43 | 1.19 | 3.45 | 1.41      | 5.7 | 5.48 | 30.36 | 7.39  |
| 100 | M | 46 | 168 | 90    | 31.9 | 148 | 89  | 5.92 | 0.61 | 2.52 | 12.4<br>2 | 7.5 | 10.1 | 35.6  | 15.98 |
| 101 | M | 30 | 169 | 95    | 33.3 | 128 | 74  | 4.52 | 0.86 | 3.09 | 0.65      | 5.9 | 4.36 | 48.19 | 9.34  |
| 102 | F | 37 | 164 | 84    | 31.2 | 138 | 93  | 3.92 | 0.98 | 2.33 | 1.82      | 6.2 | 6.92 | 36.69 | 11.28 |
| 103 | M | 34 | 183 | 136.8 | 40.9 | 173 | 109 | 4.95 | 0.95 | 3.15 | 1.44      | 6   | 5.62 | 22.96 | 5.73  |
| 104 | F | 25 | 165 | 103   | 37.8 | 126 | 77  |      | 0.93 | 2.13 | 0.77      | 8.6 | 9.17 | 24.47 | 9.97  |
| 105 | F | 25 | 153 | 64    | 27.3 | 112 | 75  | 4.71 | 1.38 | 2.79 | 0.84      | 5.4 | 4.83 | 17.6  | 3.78  |
| 106 | M | 31 | 178 | 96    | 30.5 | 120 | 70  | 5.49 | 1.28 | 3.44 | 0.95      | 7.2 | 7.92 | 22.18 | 7.81  |
| 107 | F | 23 | 167 | 80    | 28.7 | 110 | 70  | 5.71 | 1.84 | 3.15 | 1.09      | 5   | 5.13 | 13.18 | 3.01  |
| 108 | M | 42 | 173 | 92    | 30.7 | 188 | 118 | 4.67 | 1.26 | 2.72 | 1.27      | 6.1 | 8.69 | 11.01 | 4.25  |
| 109 | F | 43 | 159 | 75    | 29.9 | 129 | 81  | 5.33 | 1.05 | 3.28 | 2.49      | 7.4 | 8.15 | 21.59 | 7.82  |
| 110 | F | 34 | 163 | 86    | 32.4 | 120 | 70  | 4.75 | 1.51 | 2.67 | 2.18      | 4.9 | 5.22 | 9.76  | 2.26  |
| 111 | M | 18 | 183 | 110   | 32.8 | 114 | 61  | 5.88 | 0.92 | 3.98 | 1.52      | 4.8 | 4.71 | 26.54 | 5.56  |
| 112 | M | 28 | 177 | 93    | 29.7 | 145 | 97  | 3.39 | 0.86 | 1.98 | 1.49      | 4.7 | 4.81 | 13.86 | 2.96  |

|     |   |    |     |       |      |     |     |      |      |      |      |      |      |       |       |
|-----|---|----|-----|-------|------|-----|-----|------|------|------|------|------|------|-------|-------|
| 113 | F | 56 | 163 | 74    | 27.9 | 142 | 75  | 5.07 | 1.24 | 3.1  | 1.28 | 5.7  | 5.74 | 11.74 | 3.00  |
| 114 | F | 42 | 155 | 63.5  | 26.4 | 131 | 85  |      |      |      |      |      |      |       |       |
| 115 | F | 29 | 162 | 81.9  | 31.2 | 121 | 75  | 4.66 | 0.92 | 2.81 | 1.72 | 5.3  | 4.94 | 19.62 | 4.31  |
| 116 | M | 24 | 171 | 118   | 40.4 | 130 | 70  | 5.11 | 1.02 | 3.19 | 1.26 | 5.8  | 4.86 | 25.9  | 5.59  |
| 117 | F | 46 | 160 | 65    | 25.4 | 162 | 101 | 6.34 | 1.14 | 3.87 | 1.28 | 6.4  | 7.31 | 14.83 | 4.82  |
| 118 | F | 54 | 163 | 108   | 40.7 | 140 | 80  | 5.43 | 1.47 | 2.91 | 2.46 | 5.8  | 5.96 | 33.4  | 8.85  |
| 119 | F | 28 | 165 | 94    | 34.5 | 112 | 80  | 5.84 | 1.25 | 3.73 | 1.24 | 5.6  | 5.73 | 23.74 | 6.05  |
| 120 | F | 34 | 159 | 74.5  | 29.5 | 110 | 69  | 4.39 | 0.9  | 2.84 | 1.04 | 5.2  | 5.49 | 22.95 | 5.60  |
| 121 | F | 33 | 160 | 71    | 27.7 | 120 | 70  | 4.99 | 1.48 | 3.06 | 0.76 | 5.1  | 5.06 |       |       |
| 122 | F | 44 | 163 | 71.5  | 26.9 | 111 | 78  | 4.26 | 0.91 | 2.85 | 1.55 | 5.2  | 5.03 | 14.85 | 3.32  |
| 123 | F | 20 | 162 | 85    | 32.4 | 120 | 80  | 3.51 | 1.15 | 1.86 | 1    | 8.8  | 9.42 | 17.82 | 7.46  |
| 124 | F | 57 | 158 | 69    | 27.6 | 123 | 84  | 5.88 | 1.29 | 4.01 | 0.99 | 5.6  | 5.36 | 7.4   | 1.76  |
| 125 | F | 49 | 168 | 119   | 42.2 | 172 | 95  | 3.95 | 0.83 | 2.45 | 1.89 | 4.8  | 6.46 | 16.27 | 4.67  |
| 126 | F | 18 | 168 | 96.7  | 34.3 | 101 | 63  | 5.15 | 1.15 | 3.3  | 1.59 | 5.3  | 5.08 | 38.51 | 8.69  |
| 127 | F | 26 | 163 | 91.9  | 34.6 | 152 | 92  | 5.5  | 1.22 | 3.36 | 2.17 | 7.2  | 7.75 | 89.95 | 30.98 |
| 128 | F | 24 | 155 | 71.1  | 29.6 | 132 | 74  | 4.64 | 0.82 | 3.1  | 2.26 | 12.6 | 17.7 | 26.3  | 20.69 |
| 129 | M | 28 | 160 | 80    | 31.3 | 125 | 68  | 5.76 | 0.92 | 3.88 | 1.8  | 5.4  | 5.03 | 15.67 | 3.50  |
| 130 | F | 18 | 164 | 89.6  | 33.3 | 117 | 64  | 5.3  | 1.4  | 3.38 | 1.06 | 5.2  | 5.45 | 29.23 | 7.08  |
| 131 | F | 34 | 167 | 78    | 28.0 | 101 | 58  | 5.18 | 0.83 | 3.56 | 1.03 | 5.2  | 5.51 | 10.14 | 2.48  |
| 132 | M | 18 | 183 | 116   | 34.6 | 131 | 69  | 4.71 | 0.92 | 3.02 | 1.45 | 5.3  | 4.82 | 52.14 | 11.17 |
| 133 | M | 28 | 173 | 97.5  | 32.6 | 160 | 110 | 4.95 | 1.57 | 2.93 | 1    | 5.6  | 5.36 | 21.94 | 5.23  |
| 134 | F | 36 | 159 | 79.6  | 31.5 | 122 | 68  | 5.68 | 0.96 | 3.13 | 5.51 | 5.7  | 5.83 | 19.23 | 4.98  |
| 135 | F | 40 | 160 | 96.5  | 37.7 | 133 | 91  | 7.31 | 1.29 | 4.67 | 2.91 | 6.2  | 7.23 | 34.83 | 11.19 |
| 136 | M | 18 | 182 | 111   | 33.5 | 145 | 81  | 4.64 | 1.21 | 2.86 | 1.62 | 5.1  | 5.15 | 73.85 | 16.90 |
| 137 | M | 25 | 185 | 133   | 38.9 | 142 | 103 | 4.57 | 1.06 | 2.85 | 2.58 | 6    | 6.41 | 22.26 | 6.34  |
| 138 | F | 37 | 164 | 82.4  | 30.6 | 119 | 75  | 4.94 | 1.5  | 2.95 | 1.14 | 5.3  | 5.58 | 45.66 | 11.32 |
| 139 | M | 20 | 176 | 126.2 | 40.7 | 130 | 96  | 5.74 | 1.23 | 3.54 | 1.36 | 5.7  | 5.1  | 40.36 | 9.15  |
| 140 | M | 31 | 163 | 98.5  | 37.1 | 111 | 80  | 5.13 | 1.08 | 3.37 | 1.09 | 6.3  | 6.7  | 35.34 | 10.52 |
| 141 | M | 18 | 193 | 121.2 | 32.5 | 116 | 72  | 3.6  | 1.04 | 2.17 | 1.14 | 5.1  | 4    | 9.83  | 1.75  |
| 142 | F | 31 | 167 | 93    | 33.3 | 152 | 99  | 4.58 | 1.24 | 2.88 | 1.1  | 5    | 5.41 |       |       |
| 143 | F | 30 | 160 | 82    | 32.0 | 115 | 75  | 5.14 | 0.96 | 3.38 | 1.1  | 5.8  | 6.61 | 21.17 | 6.22  |
| 144 | F | 24 | 163 | 90    | 33.9 | 136 | 95  | 5.5  | 1.44 | 3.39 | 0.68 | 4.5  | 5.31 | 12.52 | 2.95  |
| 145 | F | 25 | 170 | 112.5 | 38.9 | 130 | 93  |      |      |      |      | 6.1  | 6.9  | 68.01 | 20.86 |
| 146 | M | 19 | 175 | 103   | 33.6 | 123 | 73  | 3.99 | 0.94 | 2.45 | 1.64 | 4.8  | 5.13 | 26.6  | 6.06  |
| 147 | F | 34 | 152 | 62    | 26.8 | 112 | 73  | 4.37 | 1.51 | 2.2  | 2.39 | 5.3  | 4.73 | 10.84 | 2.28  |
| 148 | F | 31 | 158 | 77    | 30.8 | 120 | 70  | 5.88 | 2.02 | 3.11 | 1.76 | 5.3  | 4.47 | 20.74 | 4.12  |
| 149 | F | 31 | 160 | 71    | 27.7 | 106 | 72  | 4.07 | 1.45 | 2.2  | 0.62 | 5.4  | 5.33 | 11.15 | 2.64  |
| 150 | M | 35 | 183 | 147.6 | 44.1 | 160 | 108 | 6.27 | 1.26 | 3.92 | 1.69 | 5.3  | 5.62 | 104.4 | 26.08 |
| 151 | F | 36 | 170 | 89    | 30.8 | 125 | 84  | 6.64 | 1.25 | 4.16 | 4.32 | 5.9  | 5.61 | 38.62 | 9.63  |
| 152 | F | 19 | 174 | 75.4  | 24.6 | 115 | 70  | 4.15 | 1.34 | 2.43 | 0.67 | 5.2  | 4.79 | 16.96 | 3.61  |
| 153 | M | 29 | 176 | 96.6  | 31.2 | 130 | 91  | 4.49 | 0.97 | 2.72 | 2.7  | 5.3  | 5.6  | 20.99 | 5.22  |
| 154 | F | 33 | 164 | 72    | 26.8 | 111 | 72  | 5.08 | 1.03 | 3    | 2.4  | 5.8  | 6.2  | 27.12 | 7.47  |
| 155 | F | 26 | 153 | 80    | 34.2 | 135 | 84  | 4.98 | 1.03 | 3.25 | 1.3  | 4.9  | 5.92 | 20.36 | 5.36  |

|     |   |    |     |       |      |     |     |      |      |      |      |     |      |       |       |
|-----|---|----|-----|-------|------|-----|-----|------|------|------|------|-----|------|-------|-------|
| 156 | F | 31 | 165 | 80.5  | 29.6 | 102 | 65  | 4.35 | 1.18 | 2.63 | 1.12 | 5.2 | 5.22 | 14.55 | 3.38  |
| 157 | F | 20 | 171 | 106   | 36.3 | 136 | 75  | 4.59 | 0.99 | 2.69 | 2.85 | 5.1 | 4.55 | 26.82 | 5.42  |
| 158 | F | 30 | 152 | 66    | 28.6 | 138 | 90  | 5.23 | 0.91 | 3.48 | 1.8  | 5.8 | 5.3  | 17.51 | 4.12  |
| 159 | F | 47 | 170 | 94    | 32.5 | 128 | 77  | 8.08 | 1.3  | 5.49 | 1.84 | 5.7 | 4.96 | 10.31 | 2.27  |
| 160 | M | 36 | 172 | 118   | 39.9 | 146 | 93  | 5.19 | 1    | 3.49 | 0.8  | 6.1 | 6.58 | 33.1  | 9.68  |
| 161 | F | 21 | 163 | 78    | 29.4 | 129 | 71  | 4.26 | 1.35 | 2.53 | 0.65 | 5   | 4.97 | 18.26 | 4.03  |
| 162 | F | 30 | 165 | 121   | 44.4 | 133 | 82  | 6.55 | 1.3  | 3.91 | 2.76 | 7.3 | 6.37 | 19.22 | 5.44  |
| 163 | M | 35 | 165 | 105   | 38.6 | 123 | 79  | 4.11 | 1.38 | 2.35 | 1.13 | 5.9 | 5.51 | 78.84 | 19.31 |
| 164 | F | 21 | 170 | 98    | 33.9 | 132 | 77  | 4.68 | 1.14 | 2.87 | 1.61 | 5.4 | 5.45 | 31.63 | 7.66  |
| 165 | M | 33 | 173 | 116   | 38.8 | 146 | 92  | 6.39 | 1.07 | 4.14 | 2.1  | 5.9 | 5.82 | 23.91 | 6.18  |
| 166 | M | 25 | 181 | 143   | 43.6 | 156 | 102 | 6.96 | 1.12 | 4.44 | 2.13 | 5.9 | 5.12 | 26.63 | 6.06  |
| 167 | M | 34 | 171 | 89.3  | 30.5 | 121 | 83  | 5.37 | 1.28 | 3.14 | 1.62 | 5.4 | 5.17 | 41.68 | 9.58  |
| 168 | M | 40 | 173 | 83.9  | 28.0 | 110 | 70  | 3.92 | 1.21 | 2.41 | 0.94 | 5.6 | 5.1  | 12.05 | 2.73  |
| 169 | F | 40 | 148 | 72    | 32.9 | 138 | 98  | 4.51 | 1.46 | 2.49 | 0.95 | 6.1 | 5.67 | 16.35 | 4.12  |
| 170 | F | 22 | 163 | 88.6  | 30.1 | 120 | 90  | 4.99 | 1.04 | 3.4  | 2.49 | 5.2 | 5.52 | 32.53 | 7.98  |
| 171 | M | 29 | 165 | 150   | 55.1 | 140 | 90  | 5.2  | 0.76 | 3.49 | 1.99 | 5.7 | 5.62 | 40.44 | 10.10 |
| 172 | F | 24 | 175 | 105   | 34.3 | 142 | 91  | 5.21 | 1    | 3.02 | 3.6  | 5.5 | 5.68 | 22.57 | 5.70  |
| 173 | F | 26 | 167 | 108   | 38.7 | 158 | 98  | 4.54 | 1.16 | 2.81 | 1.39 | 6.4 | 6.76 |       |       |
| 174 | F | 37 | 159 | 71.5  | 28.3 | 136 | 87  | 4.29 | 1.39 | 2.42 | 1.09 | 5.2 | 4.98 | 9.72  | 2.15  |
| 175 | F | 30 | 167 | 75    | 26.9 | 122 | 87  | 3.76 | 0.74 | 2.42 | 2.25 | 5.9 | 7.57 | 25.01 | 8.41  |
| 176 | M | 33 | 172 | 95    | 32.1 | 135 | 93  | 4.37 | 0.92 | 2.73 | 1.81 | 7.4 | 6.31 | 13.13 | 3.68  |
| 177 | M | 24 | 171 | 75    | 25.7 | 120 | 70  | 5.45 | 1.53 | 3.4  | 1.09 | 5.5 | 5.19 | 12.15 | 2.80  |
| 178 | F | 58 | 154 | 91    | 38.4 | 155 | 74  | 5.81 | 1.25 | 3.72 | 1.38 | 6.4 | 7.41 | 25.68 | 8.46  |
| 179 | M | 26 | 183 | 97.4  | 29.1 | 158 | 103 | 5.74 | 1.02 | 3.76 | 3.52 | 5.4 | 4.77 | 16.82 | 3.57  |
| 180 | M | 23 | 175 | 114.5 | 37.4 | 125 | 79  | 5.83 | 1.19 | 3.58 | 2.16 | 5.6 | 5.81 | 24.26 | 6.26  |
| 181 | F | 52 | 165 | 78    | 28.7 | 139 | 86  | 6.13 | 1.35 | 3.84 | 3.43 | 5.3 | 5.01 | 19.04 | 4.24  |
| 182 | M | 35 | 180 | 103   | 31.8 | 156 | 96  | 5.28 | 1.21 | 3.3  | 2.17 | 5.3 | 5.3  | 15.29 | 3.60  |
| 183 | F | 57 | 160 | 71    | 27.7 | 149 | 76  | 5.89 | 1.71 | 3.26 | 1.34 | 6.1 | 6.78 | 9.9   | 2.98  |
| 184 | M | 30 | 156 | 78    | 32.1 |     |     | 6.34 | 1.06 | 3.94 | 3.18 | 5.1 | 5.13 | 21.26 | 4.85  |
| 185 | F | 31 | 167 | 101   | 36.2 | 142 | 85  | 5.34 | 1.1  | 3.39 | 1.44 | 6.1 | 5.63 | 28.07 | 7.02  |
| 186 | F | 28 | 163 | 75    | 28.2 | 137 | 95  |      |      |      |      | 5.3 | 5.46 | 41.13 | 9.98  |
| 187 | F | 30 | 165 | 86.5  | 31.8 | 124 | 78  | 3.45 | 1.05 | 1.99 | 0.72 | 5.4 | 5.17 | 14.08 | 3.24  |
| 188 | M | 29 | 179 | 103   | 35.6 | 129 | 93  | 7.17 | 1.46 | 4.58 | 1.92 | 5.1 | 5.7  | 37.43 | 9.48  |
| 189 | M | 19 | 165 | 106   | 38.9 | 149 | 65  | 4.61 | 0.92 | 3.12 | 1.02 | 5.2 | 4.63 | 33.48 | 6.89  |
| 190 | M | 29 | 177 | 113   | 36.1 | 130 | 90  | 3.81 | 1.31 | 2.06 | 0.86 | 4.7 | 5.6  | 22.69 | 5.65  |
| 191 | M | 38 | 175 | 94    | 30.7 | 121 | 83  | 5.46 | 1.02 | 3.29 | 3.59 | 5.5 | 5.3  | 15.07 | 3.55  |
| 192 | M | 26 | 174 | 123   | 40.6 | 147 | 105 | 6.68 | 1.36 | 4.08 | 2.61 | 5.4 | 5.55 | 41.27 | 10.18 |
| 193 | M | 33 | 169 | 99    | 34.7 | 180 | 120 | 5.59 | 0.97 | 3.68 | 3.31 | 6.6 | 5.43 | 33.52 | 8.09  |
| 194 | F | 24 | 170 | 93    | 32.2 | 134 | 84  | 4.89 | 1.28 | 3.23 | 1.08 | 4.5 | 4.6  | 26.92 | 5.50  |
| 195 | F | 39 | 160 | 80    | 31.3 | 130 | 70  | 4.89 | 1.35 | 3.13 | 1.08 | 5.4 | 5.24 | 10.15 | 2.36  |
| 196 | F | 23 | 165 | 131.5 | 48.3 | 133 | 89  | 4.32 | 1.09 | 2.78 | 1.59 | 6.8 | 6.22 | 44.08 | 12.19 |
| 197 | F | 29 | 165 | 93    | 34.2 | 130 | 96  |      |      |      |      | 5.1 | 5.12 | 30.22 | 6.88  |
| 198 | F | 46 | 161 | 66.8  | 25.8 | 120 | 70  | 6.3  | 1.49 | 4.09 | 2.09 | 5.6 | 6.16 | 17.82 | 4.88  |

|     |   |    |     |       |      |     |     |      |      |      |      |     |       |       |       |
|-----|---|----|-----|-------|------|-----|-----|------|------|------|------|-----|-------|-------|-------|
| 199 | F | 21 | 163 | 77    | 29.0 | 127 | 90  | 3.91 | 0.89 | 2.62 | 0.67 |     | 5.08  | 11.4  | 2.57  |
| 200 | M | 28 | 175 | 92    | 30.0 | 139 | 94  |      |      |      |      |     |       |       |       |
| 201 | F | 31 | 159 | 96.2  | 38.1 | 129 | 85  | 3.5  | 0.89 | 2.17 | 0.91 | 5.6 | 5.37  | 29.46 | 7.03  |
| 202 | M | 27 | 170 | 78    | 27.0 | 132 | 87  | 4.45 | 1.2  | 2.73 | 1.16 | 5.3 | 5.21  | 27.69 | 6.41  |
| 203 | M | 30 | 175 | 81    | 26.4 | 120 | 70  | 6.18 | 1.09 | 3.97 | 2.12 | 5.1 | 5.43  | 20.74 | 5.01  |
| 204 | F | 21 | 163 | 86    | 32.4 | 125 | 84  | 5.79 | 1.5  | 3.33 | 2.11 | 5.2 | 5     | 62.59 | 13.91 |
| 205 | M | 31 | 182 | 101.3 | 30.6 | 136 | 85  | 5.28 | 0.75 | 3.58 | 2.07 | 7.4 | 9.94  |       |       |
| 206 | F | 38 | 162 | 75    | 28.6 | 156 | 112 | 6.21 | 1.16 | 4.1  | 2.06 | 6.4 | 6.88  | 27.27 | 8.34  |
| 207 | F | 31 | 173 | 90    | 30.1 | 131 | 81  | 7.1  | 1.36 | 4.36 | 3.89 | 8.2 | 11.11 | 27.38 | 13.52 |
| 208 | F | 29 | 163 | 71.5  | 26.9 | 125 | 76  | 4.33 | 1.26 | 2.88 | 0.9  | 5.7 | 6.98  | 20.51 | 6.36  |
| 209 | F | 29 | 158 | 79    | 31.6 | 133 | 92  | 4.77 | 1.18 | 3.02 | 0.82 | 4.6 | 5.44  | 14.78 | 3.57  |
| 210 | F | 35 | 158 | 77    | 30.8 | 137 | 92  |      |      |      |      | 5.6 |       | 30.86 |       |
| 211 | M | 42 | 174 | 95    | 31.4 | 130 | 90  | 4.68 | 0.83 | 3    | 3.58 | 8.4 | 6.68  | 25.81 | 7.66  |
| 212 | F | 24 | 164 | 69    | 25.7 | 102 | 69  | 4.3  | 0.91 | 2.5  | 3.45 | 7.7 | 5.96  | 15.95 | 4.22  |
| 213 | F | 37 | 160 | 74.5  | 29.1 | 179 | 133 | 6.05 | 1.63 | 3.85 | 1.51 |     | 6.07  | 36.15 | 9.75  |
| 214 | F | 26 | 158 | 72    | 28.8 | 116 | 78  | 3.79 | 1.08 | 2.47 | 0.55 | 5   | 5.82  | 16.56 | 4.28  |
| 215 | F | 20 | 172 | 89    | 30.1 | 120 | 70  | 7.05 | 1.15 | 4.6  | 1.46 | 5   | 4.98  | 26.57 | 5.88  |
| 216 | F | 25 | 163 | 66.5  | 25.0 | 116 | 81  | 4.2  | 1.23 | 2.65 | 1.34 | 4.9 | 5.4   | 18.95 | 4.55  |
| 217 | M | 23 | 176 | 95    | 30.7 | 118 | 73  |      |      |      |      | 5.3 | 5.26  | 27.05 | 6.32  |
| 218 | F | 26 | 172 | 124.5 | 42.1 | 128 | 79  | 5.9  | 1.1  | 3.88 | 1.18 | 6.5 | 5.92  | 56.48 | 14.86 |
| 219 | M | 39 | 183 | 105   | 31.4 | 130 | 80  | 2.39 | 1.06 | 1.14 | 2.47 | 8.3 | 8.01  | 20.92 | 7.45  |
| 220 | F | 33 | 158 | 72    | 28.8 | 135 | 82  | 4.55 | 1.26 | 2.74 | 1.07 | 5.2 | 5.49  | 29.55 | 7.21  |
| 221 | M | 28 | 168 | 92    | 32.6 | 137 | 91  | 4.66 | 0.7  | 2.89 | 5.12 |     | 8.29  | 34.56 | 12.73 |
| 222 | M | 43 | 177 | 99    | 31.6 | 123 | 93  | 5.11 | 1.44 | 3.04 | 1.76 | 7.3 | 7.75  | 24.23 | 8.35  |
| 223 | M | 36 | 170 | 71    | 24.6 | 120 | 76  | 4.13 | 0.83 | 2.61 | 1.97 |     | 4.68  | 22.04 | 4.58  |
| 224 | F | 40 | 160 | 92.2  | 36.0 | 125 | 81  | 5.64 | 1.38 | 3.41 | 1.62 | 5.8 | 6.88  | 13.47 | 4.12  |
| 225 | F | 31 | 158 | 62    | 24.8 | 123 | 71  | 5.36 | 1.39 | 3.3  | 1.89 |     | 4.99  | 12.91 | 2.86  |
| 226 | F | 24 | 163 | 76    | 28.6 | 119 | 75  | 4.66 | 1.12 | 3.04 | 1.34 | 5.8 | 5.59  | 16.31 | 4.05  |
| 227 | M | 29 | 172 | 87    | 29.4 | 133 | 94  | 6.82 | 1.03 | 4.62 | 2.21 | 6.4 | 7.15  | 16.92 | 5.38  |
| 228 | F | 34 | 162 | 79    | 30.1 | 126 | 73  | 4.99 | 1.59 | 2.87 | 1.17 | 4.6 | 4.71  | 19.4  | 4.06  |
| 229 | M | 28 | 180 | 145   | 44.8 | 163 | 115 | 6.21 | 1.22 | 3.95 | 1.32 | 7.8 | 8.81  | 89.65 | 35.10 |
| 230 | F | 30 | 160 | 75.2  | 29.4 | 157 | 99  | 4.96 | 1.26 | 3.29 | 1.93 | 5.5 | 6.13  | 24.33 | 6.63  |
| 231 | F | 33 | 160 | 88    | 34.4 | 157 | 95  | 4.33 | 1.41 | 2.77 | 0.63 | 5.1 | 5.44  | 11.83 | 2.86  |
| 232 | F | 29 | 156 | 72    | 29.6 | 141 | 85  | 4.66 | 1.29 | 2.54 | 2.76 | 4.8 | 5.05  | 41.35 | 9.28  |
| 233 | F | 39 | 160 | 96.5  | 37.7 | 138 | 91  | 4.24 | 1.02 | 2.74 | 1.29 | 6.7 | 7.91  | 71.83 | 25.25 |
| 234 | F | 32 | 156 | 76    | 31.2 | 125 | 77  | 5.62 | 1.86 | 3.12 | 1.42 | 5.6 | 5.31  | 18.52 | 4.37  |
| 235 | F | 28 | 158 | 104   | 41.7 | 134 | 97  | 6.68 | 1.05 | 4.15 | 3.65 | 6   | 6.21  | 52.9  | 14.60 |
| 236 | F | 31 | 153 | 74.2  | 31.7 | 128 | 69  | 5.53 | 1.01 | 3.55 | 2.2  |     | 4.96  | 22.7  | 5.00  |
| 237 | F | 22 | 158 | 72.2  | 28.9 | 141 | 107 | 5.99 | 1.26 | 3.54 | 4.02 | 5   | 5.24  | 60.2  | 14.02 |
| 238 | F | 19 | 163 | 107.8 | 38.8 | 120 | 85  | 5.84 | 1.67 | 3.48 | 1.52 | 8.5 | 9.96  | 60.47 | 26.77 |
| 239 | M | 20 | 173 | 104   | 34.8 | 127 | 74  | 4.02 | 1.27 | 2.28 | 1.01 | 4.9 | 4.88  | 15.75 | 3.42  |
| 240 | F | 54 | 152 | 73    | 31.6 | 152 | 102 | 4.97 | 1.74 | 2.56 | 1.87 | 5.6 | 6.58  | 27.11 | 7.93  |
| 241 | F | 40 | 150 | 96    | 42.7 | 161 | 103 | 4.12 | 1    | 2.53 | 1.25 | 7.1 | 6.97  | 65.38 | 20.25 |

|     |   |    |     |       |      |     |     |      |      |      |      |     |      |       |       |
|-----|---|----|-----|-------|------|-----|-----|------|------|------|------|-----|------|-------|-------|
| 242 | M | 31 | 173 | 91    | 30.4 | 130 | 82  | 6.15 | 1.15 | 3.68 | 5.13 | 6   | 6.88 | 14.05 | 4.30  |
| 243 | F | 31 | 154 | 83.7  | 35.3 | 113 | 76  | 4.22 | 1.01 | 4.24 | 4.3  | 4.9 | 5.31 | 26.32 | 6.21  |
| 244 | F | 33 | 163 | 107   | 40.3 | 144 | 100 | 6.54 | 1.32 | 4.18 | 2.7  |     | 6.97 | 49.43 | 15.31 |
| 245 | M | 36 | 181 | 128.5 | 39.2 | 127 | 83  | 6.1  | 0.79 | 3.93 | 1.89 | 9.8 | 7.19 | 32.21 | 10.29 |
| 246 | F | 40 | 162 | 96    | 36.6 | 120 | 80  |      |      |      |      |     | 5.19 | 30.13 | 6.95  |
| 247 | M | 27 | 172 | 94    | 31.8 | 139 | 96  | 5.18 | 0.97 | 3.63 | 0.78 | 5   | 5.59 | 11.18 | 2.78  |
| 248 | M | 49 | 165 | 92    | 33.8 | 100 | 80  | 5.77 | 0.94 | 3.63 | 2.94 | 5.1 | 4.98 | 17.36 | 3.84  |
| 249 | M | 18 | 175 | 86    | 28.1 | 129 | 72  | 2.8  | 1.12 | 1.37 | 1.27 |     | 4.95 | 44.82 | 9.86  |
| 250 | F | 29 | 160 | 70    | 27.3 | 121 | 73  | 5.96 | 1.4  | 3.88 | 1.44 |     | 5.24 | 7.97  | 1.86  |
| 251 | F | 31 | 160 | 83    | 32.4 | 137 | 96  | 5.08 | 1.14 | 3.27 | 1.95 |     | 4.9  | 8.36  | 1.82  |
| 252 | F | 26 | 156 | 70    | 28.8 | 133 | 78  | 5.26 | 1.08 | 3.48 | 1.86 |     | 4.29 | 22.31 | 4.25  |
| 253 | M | 26 | 177 | 95    | 30.3 | 136 | 86  | 5.24 | 0.86 | 3.74 | 1.51 | 4.9 | 4.79 | 18.65 | 3.97  |
| 254 | F | 34 | 160 | 93    | 36.3 | 130 | 92  | 6.15 | 1.01 | 4.18 | 1.35 | 6.7 | 7.85 | 32.25 | 11.25 |
| 255 | F | 26 | 170 | 100.1 | 34.6 | 128 | 79  | 4.96 | 1.21 | 3.23 | 1.22 | 5   | 5.08 | 11.33 | 2.56  |
| 256 | F | 25 | 155 | 65    | 27.1 | 159 | 117 | 4.33 | 1.39 | 2.46 | 1.9  | 5.1 | 5.41 | 21.88 | 5.26  |
| 257 | M | 35 | 179 | 119   | 37.1 | 130 | 92  | 4.43 | 0.98 | 2.83 | 2.14 |     | 6.29 | 24.95 | 6.97  |
| 258 | F | 29 | 152 | 69.5  | 30.1 | 132 | 98  | 6.89 | 1.59 | 4.29 | 2.45 | 5.4 | 5.49 |       |       |
| 259 | F | 26 | 160 | 68    | 26.6 | 120 | 89  | 4.45 | 1.2  | 2.77 | 1.31 | 5.2 | 4.53 | 18.65 | 3.75  |
| 260 | F | 30 | 158 | 85    | 34.1 | 128 | 78  | 4.07 | 1.09 | 2.49 | 1.65 | 5.3 | 5.55 | 15.54 | 3.83  |
| 261 | F | 24 | 168 | 94    | 33.3 | 125 | 74  |      |      |      |      | 5.4 | 5.3  | 18.58 | 4.38  |
| 262 | F | 40 | 167 | 90    | 32.3 | 135 | 80  |      |      |      |      | 5.8 | 6.36 | 44.32 | 12.53 |
| 263 | F | 28 | 165 | 129   | 47.4 | 185 | 124 | 7.02 | 1.3  | 4.52 | 2.28 |     | 5.75 |       |       |
| 264 | F | 22 | 160 | 88    | 34.4 | 134 | 90  | 5.99 | 0.83 | 4.15 | 1.93 | 6.1 | 6.32 | 32.3  | 9.07  |
| 265 | F | 29 | 160 | 70.8  | 27.7 | 129 | 86  | 5.2  | 1.6  | 3.02 | 1.09 | 5.2 | 4.77 | 10.35 | 2.19  |
| 266 | F | 33 | 170 | 81.2  | 28.1 | 126 | 77  | 4.15 | 1.18 | 2.42 | 1.35 | 5.1 | 5.44 | 17.94 | 4.34  |
| 267 | F | 33 | 160 | 67    | 26.2 | 145 | 95  | 4.48 | 1.57 | 2.46 | 1.27 | 5.2 | 5.31 | 6.47  | 1.53  |
| 268 | F | 33 | 153 | 58    | 24.8 | 109 | 72  | 5.15 | 1.09 | 3.34 | 1.62 | 5.4 | 5.1  | 12.53 | 2.84  |
| 269 | F | 43 | 162 | 84.4  | 32.2 | 113 | 72  | 6.4  | 1.79 | 3.83 | 1.11 | 5.4 | 5.93 | 11.28 | 2.97  |
| 270 | F | 26 | 163 | 75    | 28.2 | 138 | 89  | 5.18 | 1.33 | 3.24 | 0.68 | 5.5 | 5.89 | 47.65 | 12.47 |
| 271 | F | 31 | 153 | 64    | 27.3 | 114 | 80  | 6.06 | 1.69 | 3.75 | 0.76 | 4.7 | 5.63 | 8.07  | 2.02  |
| 272 | F | 23 | 160 | 70    | 27.3 | 121 | 75  | 4.11 | 1.09 | 2.57 | 1.57 | 5.4 | 4.7  | 10.74 | 2.24  |
| 273 | F | 27 | 163 | 96    | 36.1 | 121 | 79  | 5.77 | 1.44 | 3.68 | 1.04 | 5.2 | 5.2  | 20.45 | 4.73  |
| 274 | M | 19 | 178 | 106   | 33.6 | 124 | 67  | 5.06 | 1.35 | 3.07 | 1.04 | 5.1 | 5.15 | 35.41 | 8.10  |
| 275 | M | 19 | 183 | 99    | 29.6 | 132 | 92  | 5.29 | 1.07 | 3.47 | 1.84 | 5.3 | 5.58 | 32.17 | 7.98  |
| 276 | F | 32 | 158 | 65.5  | 26.2 | 113 | 71  | 4.85 | 0.92 | 3.34 | 1.37 | 5.5 | 5.43 | 21.36 | 5.15  |
| 277 | F | 18 | 164 | 87    | 32.4 | 108 | 66  | 5.04 | 1.19 | 3.21 | 1.11 | 5.5 | 5.9  | 26.31 | 6.90  |
| 278 | F | 22 | 150 | 66    | 29.3 | 125 | 62  | 5.01 | 1.23 | 3.03 | 2.03 | 5.8 | 5.16 | 14.44 | 3.31  |
| 279 | F | 27 | 160 | 78    | 30.5 | 126 | 75  | 6.91 | 1.13 | 4.65 | 1.98 |     | 6.14 | 15.35 | 4.19  |
| 280 | M | 23 | 178 | 91.2  | 28.8 | 127 | 78  | 4.43 | 1.2  | 2.91 | 0.91 | 5.1 | 5.48 | 15.04 | 3.66  |
| 281 | F | 33 | 163 | 96    | 36.1 | 124 | 76  | 5.6  | 1.52 | 3.5  | 0.92 | 5.1 | 5.95 | 19.45 | 5.14  |
| 282 | F | 29 | 160 | 65    | 25.4 | 126 | 79  | 5.4  | 0.9  | 3.49 | 2.9  | 5.1 | 5.63 | 24.75 | 6.19  |
| 283 | M | 24 | 171 | 109   | 37.3 | 118 | 81  | 5.87 | 1.25 | 4.08 | 1.17 | 4.9 | 4.77 | 15.61 | 3.31  |
| 284 | F | 19 | 160 | 80.5  | 31.4 | 114 | 82  | 4.65 | 1.3  | 2.84 | 1.06 | 5   | 5    | 15.09 | 3.35  |

|     |   |    |     |       |      |     |     |      |      |      |      |      |       |       |       |
|-----|---|----|-----|-------|------|-----|-----|------|------|------|------|------|-------|-------|-------|
| 285 | F | 29 | 164 | 102.1 | 38.0 | 130 | 80  | 4.55 | 1.23 | 3.01 | 1.31 | 5    | 4.56  | 14.16 | 2.87  |
| 286 | M | 19 | 187 | 112   | 32.0 | 151 | 87  | 5.01 | 1.19 | 3.34 | 1.57 | 11.4 | 11.63 | 24.88 | 12.86 |
| 287 | M | 34 | 176 | 110   | 35.5 | 127 | 89  | 4.33 | 0.98 | 2.7  | 2.48 | 8.1  | 9.29  | 52.18 | 21.54 |
| 288 | M | 22 | 178 | 101   | 31.9 | 119 | 72  | 3.28 | 0.9  | 1.96 | 1.86 | 5    | 5.12  | 12.27 | 2.79  |
| 289 | M | 28 | 171 | 108   | 36.9 | 160 | 110 | 5.61 | 1.21 | 3.55 | 1.73 | 5.1  | 5.82  | 26.3  | 6.80  |
| 290 | M | 19 | 175 | 113.6 | 37.1 | 121 | 72  | 5.34 | 1.22 | 3.5  | 1.3  | 5.5  | 5.57  | 55.45 | 13.73 |
| 291 | F | 35 | 166 | 98.2  | 35.6 | 121 | 65  | 3.87 | 0.93 | 2.63 | 0.6  | 5.8  | 5.17  | 13.62 | 3.13  |
| 292 | F | 20 | 172 | 107   | 36.2 | 139 | 91  | 3.46 | 0.84 | 2.33 | 1.18 | 4.7  | 4.49  | 15.06 | 3.01  |
| 293 | M | 25 | 185 | 132   | 38.6 | 164 | 97  | 4.66 | 0.8  | 3.25 | 1.2  | 4.7  | 5.22  | 13.77 | 3.19  |
| 294 | F | 18 | 163 | 90    | 33.9 | 133 | 80  | 4.69 | 1.15 | 3.07 | 1.96 | 4.5  | 4.7   | 15.12 | 3.16  |
| 295 | F | 28 | 170 | 96    | 33.2 | 124 | 86  |      |      |      |      | 5    | 4.88  | 32.33 | 7.01  |
| 296 | M | 24 | 176 | 96.7  | 31.2 | 145 | 92  | 4.87 | 1.28 | 3.19 | 1.69 | 4.9  | 5.35  | 33.43 | 7.95  |
| 297 | M | 33 | 170 | 95    | 32.9 | 158 | 108 | 6.14 | 1.39 | 3.79 | 4.53 | 5.6  | 7.16  | 36.39 | 11.58 |
| 298 | F | 20 | 170 | 81    | 28.0 | 111 | 57  | 4.36 | 1.38 | 2.6  | 1.2  | 4.9  | 4.84  | 14.24 | 3.06  |
| 299 | M | 34 | 168 | 92    | 32.6 | 150 | 107 | 5.98 | 1.06 | 4.03 | 1.34 | 5.9  | 6.57  | 65.07 | 19.00 |
| 300 | M | 33 | 180 | 112   | 34.6 | 145 | 106 | 4.3  | 1.07 | 2.85 | 1.08 | 5    | 5.2   | 14.77 | 3.41  |
| 301 | F | 21 | 174 | 125   | 41.3 | 124 | 89  | 3.77 | 1.08 | 2.15 | 1.42 | 5.5  | 5.68  | 81.93 | 20.68 |
| 302 | M | 26 | 175 | 124   | 40.5 | 123 | 81  | 5.06 | 1.23 | 3.09 | 1.73 | 5.5  | 5.73  | 15.23 | 3.88  |
| 303 | M | 21 | 173 | 89    | 29.7 | 116 | 77  |      |      |      |      | 5.3  | 5.13  | 21.93 | 5.00  |
| 304 | F | 21 | 161 | 110   | 42.4 | 109 | 74  | 4.87 | 0.83 | 3.12 | 2.07 | 4.8  | 4.84  | 43.28 | 9.31  |
| 305 | M | 44 | 176 | 92    | 29.7 | 129 | 75  | 6.05 | 1.37 | 3.66 | 2.43 | 6.4  | 6.79  | 23.1  | 6.97  |
| 306 | F | 19 | 156 | 78    | 32.1 | 117 | 85  | 3.9  | 1.16 | 2.25 | 0.78 | 5.2  | 5.05  | 18.24 | 4.09  |
| 307 | M | 20 | 187 | 128.3 | 36.7 | 142 | 87  | 4.02 | 0.99 | 2.54 | 1.08 | 5.1  | 5.07  | 15.81 | 3.56  |
| 308 | M | 32 | 169 | 105.7 | 37.0 | 135 | 91  | 6.72 | 0.88 | 4.64 | 2.85 | 5.4  | 5.45  | 31.33 | 7.59  |
| 309 | F | 40 | 160 | 70    | 27.3 | 168 | 102 | 4.9  | 1.09 | 3.16 | 1.69 | 5.1  | 5.39  | 10.29 | 2.47  |
| 310 | M | 34 | 170 | 97.9  | 33.9 | 128 | 84  | 4.31 | 0.92 | 2.93 | 1.12 | 5.3  | 5.39  | 32.49 | 7.78  |
| 311 | F | 30 | 160 | 80    | 31.3 | 137 | 88  |      |      |      |      |      |       | 21.36 |       |
| 312 | F | 47 | 160 | 134   | 52.3 | 140 | 80  | 6.67 | 0.84 | 2.3  | 1.44 |      | 10.18 | 22.33 |       |
| 313 | F | 21 | 165 | 96    | 35.3 | 134 | 82  | 4.13 | 1.36 | 2.4  | 0.71 | 5.2  | 5.01  | 19.87 | 4.42  |
| 314 | F | 30 | 169 | 92.4  | 32.4 | 140 | 90  | 6.31 | 1.55 | 3.94 | 2.18 | 5.3  |       | 21.5  |       |
| 315 | F | 24 | 173 | 78    | 26.1 | 117 | 74  | 4.31 | 1.03 | 2.67 | 2.01 | 5.3  | 4.82  | 54.06 | 11.58 |
| 316 | F | 25 | 160 | 92.4  | 36.1 | 121 | 78  |      |      |      |      |      | 5.85  | 21.85 | 5.68  |
| 317 | F | 54 | 158 | 88    | 35.3 | 126 | 80  | 4.99 | 1.4  | 2.99 | 2.02 | 5.2  | 5.03  | 19.46 | 4.35  |
| 318 | F | 27 | 165 | 76    | 27.9 | 132 | 88  | 6.13 | 1.12 | 4.4  | 1.68 | 4.7  | 5.39  | 21.18 | 5.07  |
| 319 | M | 31 | 174 | 110   | 36.3 | 126 | 86  |      |      |      |      | 5.2  | 5.33  | 35.44 | 8.40  |
| 320 | M | 24 | 185 | 111.2 | 32.5 | 139 | 85  | 5.44 | 1.08 | 3.92 | 1.29 | 5.6  | 5.47  | 31.64 | 7.69  |
| 321 | F | 25 | 162 | 84    | 32.0 | 131 | 74  |      |      |      |      | 5.1  | 5.33  | 14.84 | 3.52  |
| 322 | F | 34 | 156 | 75    | 30.8 | 111 | 69  |      |      |      |      | 5.3  | 5.23  | 26.67 | 6.20  |
| 323 | F | 23 | 161 | 98.9  | 38.2 | 136 | 83  | 4.09 | 1.11 | 2.63 | 1.15 | 5.3  | 4.68  | 34.89 | 7.26  |
| 324 | M | 54 | 167 | 96    | 34.4 | 144 | 83  | 4.2  | 0.86 | 3.01 | 1.56 |      | 5.1   | 9.27  | 2.10  |
| 325 | F | 38 | 155 | 73    | 30.4 | 149 | 91  | 5.41 | 1.17 | 3.49 | 2.11 | 5.3  | 4.84  | 19.59 | 4.21  |
| 326 | F | 44 | 163 | 72    | 27.1 | 127 | 80  | 6.56 | 1.45 | 4.55 | 0.9  | 5.9  | 5.84  | 10.73 | 2.79  |
| 327 | M | 31 | 178 | 113   | 35.7 | 119 | 71  | 4.2  | 0.82 | 2.67 | 2.81 | 5    | 5.5   | 41.39 | 10.12 |



|     |   |    |     |       |      |     |     |      |      |      |      |     |      |       |       |
|-----|---|----|-----|-------|------|-----|-----|------|------|------|------|-----|------|-------|-------|
| 328 | M | 37 | 182 | 113   | 34.1 | 159 | 97  | 4.69 | 1    | 3.3  | 2.08 | 5.7 | 6.13 | 28.2  | 7.68  |
| 329 | M | 35 | 176 | 103   | 33.3 | 124 | 77  | 3.81 | 1.04 | 2.46 | 1.43 | 6.5 | 6.07 | 21.89 | 5.91  |
| 330 | F | 52 | 160 | 92    | 35.9 | 147 | 90  | 5.36 | 1.25 | 3.59 | 1.91 | 5.8 | 5.43 | 36.36 | 8.77  |
| 331 | F | 32 | 155 | 89    | 37.1 | 127 | 87  | 4.72 | 1.18 | 3.13 | 2.21 | 5.8 | 5.81 | 22.86 | 5.90  |
| 332 | F | 41 | 161 | 72    | 27.8 | 136 | 86  | 5.01 | 1.44 | 3.3  | 1.43 | 5.2 | 6.3  | 7.68  | 2.15  |
| 333 | M | 37 | 168 | 103   | 36.5 | 150 | 108 | 4.14 | 0.88 | 2.8  | 1.5  | 7.3 | 6.66 | 32.36 | 9.58  |
| 334 | M | 29 | 178 | 130   | 41.0 | 126 | 53  | 5.04 | 1.11 | 3.15 | 2.66 | 5.5 | 3.72 | 16.04 | 2.65  |
| 335 | F | 30 | 163 | 95    | 35.8 | 118 | 87  | 5.41 | 1.2  |      | 1.94 | 5.9 | 5.59 | 30.86 | 7.67  |
| 336 | M | 21 | 183 | 110   | 32.9 | 130 | 80  | 6.47 | 1.29 | 4.32 | 3.66 | 5.9 | 6.1  | 31.8  | 8.62  |
| 337 | M | 30 | 171 | 126   | 43.1 | 180 | 101 | 4.21 | 1.47 | 2.21 | 0.74 | 6.2 | 6.73 | 35.66 | 10.67 |
| 338 | M | 27 | 176 | 112   | 36.2 | 166 | 105 | 4.92 | 1.14 | 3.42 | 1.23 | 5.6 | 6.6  | 51.81 | 15.20 |
| 339 | M | 27 | 176 | 100   | 32.3 | 143 | 98  |      |      |      |      | 5.3 | 5.57 | 21.54 | 5.33  |
| 340 | M | 23 | 183 | 130   | 38.8 | 158 | 94  | 4.92 | 1.2  | 3.24 | 2.7  | 5.9 | 4.31 | 77.24 | 14.80 |
| 341 | M | 21 | 176 | 107   | 34.5 | 138 | 100 | 4.52 | 1.01 | 3.03 | 2.25 | 5.3 | 5.6  | 19.87 | 4.95  |
| 342 | M | 27 | 171 | 123   | 42.1 | 168 | 90  | 6.21 | 0.95 | 4.64 | 2.86 | 5.4 | 5.86 | 30.79 | 8.02  |
| 343 | M | 36 | 187 | 105   | 30.0 | 168 | 111 | 7.37 | 1.21 | 4.71 | 3.07 | 7.6 | 8.77 | 22.43 | 8.74  |
| 344 | F | 35 | 171 | 98    | 33.5 | 128 | 81  | 5.6  | 1.25 | 3.25 | 2.5  | 5.6 | 6.98 | 26.85 | 8.33  |
| 345 | M | 33 | 180 | 120   | 37.0 | 146 | 108 | 5.45 | 1.19 | 3.69 | 2    | 5.7 | 5.8  |       |       |
| 346 | F | 21 | 160 | 96    | 37.5 | 128 | 87  | 3.96 | 1.32 | 2.38 | 1.04 |     | 4.27 | 14.93 | 2.83  |
| 347 | M | 35 | 175 | 105   | 34.3 | 107 | 74  | 6.91 | 0.92 | 4.12 | 5.54 | 6.9 | 5.93 | 20.02 | 5.28  |
| 348 | F | 23 | 157 | 82.6  | 33.7 | 126 | 86  | 4.3  | 3.15 | 1    | 0.76 | 5.3 | 5.03 | 17.65 | 3.95  |
| 349 | F | 27 | 158 | 80    | 32.0 |     |     | 5.16 | 3.61 | 1.07 | 1.21 | 5.8 | 6.95 | 24.8  | 7.66  |
| 350 | M | 57 | 168 | 81.5  | 28.9 | 109 | 68  | 5.37 | 3.3  | 1.48 | 2.62 | 6.1 | 5.03 | 20.93 | 4.68  |
| 351 | F | 25 | 163 | 85.9  | 32.3 | 121 | 88  | 7.49 | 4.66 | 1.27 | 5.33 | 7.4 | 7.67 | 26.78 | 9.13  |
| 352 | F | 29 | 167 | 89    | 31.9 | 109 | 74  | 5.24 | 3.56 | 1.45 | 0.83 |     | 5.18 | 23.89 | 5.50  |
| 353 | F | 28 | 163 | 79    | 29.7 | 114 | 67  | 4.13 | 2.74 | 1.22 | 1.36 |     | 5.11 | 9.9   | 2.25  |
| 354 | M | 57 | 172 | 92    | 31.1 | 134 | 78  | 4.6  | 2.93 | 1.05 | 2.13 | 6.1 | 5.51 | 18.07 | 4.43  |
| 355 | M | 19 | 180 | 100   | 30.9 | 122 | 71  |      | 1.02 |      |      |     |      | 14.34 |       |
| 356 | F | 51 | 162 | 80    | 30.5 | 139 | 81  | 5.7  | 3.87 | 1.16 | 1.89 |     | 6.17 | 22.74 | 6.24  |
| 357 | M | 38 | 166 | 91.9  | 33.4 | 135 | 91  | 5.92 | 4.01 | 1.37 | 1.39 |     |      | 21.52 |       |
| 358 | F | 35 | 164 | 109.9 | 40.9 | 142 | 92  | 6.79 | 4.94 | 1.32 | 2.34 | 7.1 | 5.91 |       |       |
| 359 | F | 20 | 155 | 95    | 39.5 | 134 | 86  | 5.3  | 3.06 | 1.94 | 1.96 | 5.5 | 4.69 | 28.61 | 5.96  |
| 360 | M | 25 | 174 | 95.3  | 31.7 | 126 | 75  | 6.12 | 4.16 | 1.18 | 2.71 | 5.5 | 5.37 | 18.44 | 4.40  |
| 361 | F | 29 | 163 | 76.9  | 28.9 | 134 | 81  | 5.43 | 3.71 | 1.15 | 1.82 | 5.2 | 4.7  | 5.6   |       |
| 362 | F | 29 | 168 | 98    | 34.7 | 135 | 85  | 4.71 | 3    | 0.94 | 1.94 | 5.7 | 5.03 | 51.42 | 11.50 |
| 363 | F | 31 | 168 | 88.3  | 31.3 |     |     | 4.17 | 2.83 | 1.19 | 1.49 |     | 5.45 | 14.76 | 3.58  |
| 364 | M | 22 | 178 | 107   | 33.8 | 130 | 72  | 5.1  | 3.27 | 1.19 | 1.54 | 5.3 | 5.01 | 20.8  | 4.63  |
| 365 | F | 29 | 160 | 86    | 33.6 | 130 | 76  | 3.79 | 2.22 | 1.25 | 2.14 | 5.7 | 4.82 | 24.88 | 5.33  |
| 366 | F | 42 | 158 | 75    | 30.0 | 130 | 77  | 5.19 | 3.29 | 1.3  | 0.87 | 5.5 | 5.46 | 13.62 | 3.31  |
| 367 | F | 36 | 158 | 75    | 30.0 |     |     |      |      |      |      | 5.9 | 4.74 | 11.05 | 2.33  |
| 368 | F | 49 | 161 | 92    | 35.5 |     |     | 5.02 | 3.24 | 1.17 | 1.63 | 6   | 6.02 | 33.25 | 8.90  |
| 369 | M | 23 | 171 | 102.9 | 35.4 | 126 | 85  | 6.24 | 4.21 | 1.35 | 1.65 | 5.7 | 4.42 | 28.68 | 5.63  |
| 370 | M | 32 | 175 | 100   | 32.7 | 121 | 80  | 5.14 | 3.39 | 1.07 | 1.42 | 6   | 4.76 | 14.36 | 3.04  |

|     |   |    |     |       |      |     |     |      |      |      |      |      |       |       |       |
|-----|---|----|-----|-------|------|-----|-----|------|------|------|------|------|-------|-------|-------|
| 371 | F | 26 | 170 | 98    | 33.9 | 129 | 80  | 5.75 | 4.03 | 1.01 | 2.03 | 5.2  | 4.74  | 41.24 | 8.69  |
| 372 | F | 33 | 168 | 88.5  | 31.4 | 120 | 80  | 5.68 | 3.69 | 1.46 | 1.16 | 5.7  | 5.21  | 24.39 | 5.65  |
| 373 | F | 24 | 163 | 80    | 30.1 | 129 | 85  | 6    | 4    | 1.22 | 3.58 | 5.4  | 4.87  | 17.14 | 3.71  |
| 374 | F | 21 | 156 | 95.5  | 39.2 | 118 | 86  | 6.7  | 3.47 | 1.13 | 8.64 | 7.8  | 8.52  | 53.37 | 20.21 |
| 375 | F | 50 | 166 | 116   | 42.1 |     |     |      |      |      |      |      |       |       |       |
| 376 | F | 32 | 153 | 71    | 30.3 | 133 | 78  | 4.66 | 3.22 | 0.97 | 0.95 | 5.4  | 5.36  | 30.81 | 7.34  |
| 377 | F | 38 | 151 | 106.6 | 47.1 |     |     | 5.06 | 3.31 | 1.1  | 1.57 | 5.9  | 4.58  | 24.37 | 4.96  |
| 378 | F | 47 | 155 | 88    | 36.6 | 156 | 86  | 5.34 | 3.62 | 1.13 | 2.33 | 8.1  | 8.83  | 57.46 | 22.55 |
| 379 | F | 37 | 160 | 73    | 28.5 | 120 | 74  | 7.11 | 4.83 | 1.43 | 1.56 | 6.2  | 5.26  | 12.71 | 2.97  |
| 380 | F | 23 | 162 | 87.4  | 33.5 | 115 | 72  | 5.9  | 4    | 1.26 | 0.99 | 5.6  | 5.65  | 17.65 | 4.43  |
| 381 | F | 31 | 156 | 90    | 37.0 | 132 | 90  | 6.31 | 4.44 | 1.14 | 1.56 | 5.1  | 5.16  | 19.64 | 4.50  |
| 382 | F | 18 | 173 | 82.4  | 27.5 | 125 | 75  | 6.29 | 4.06 | 1.45 | 1.32 | 5.8  | 4.51  | 61.7  | 12.37 |
| 383 | F | 30 | 160 | 77    | 30.1 |     |     | 4.28 | 2.08 | 1.75 | 0.95 | 5.3  | 5.23  | 15.13 | 3.52  |
| 384 | M | 25 | 187 | 138.1 | 39.5 | 126 | 83  | 6.47 | 4.51 | 1.08 | 2.61 | 5.5  | 5.39  | 35.79 | 8.57  |
| 385 | F | 19 | 160 | 70    | 27.3 |     |     | 5.48 | 3.56 | 1.55 | 0.79 | 5.7  | 4.93  | 31.41 | 6.88  |
| 386 | M | 19 | 163 | 77.6  | 29.2 | 123 | 68  | 3.86 | 2.44 | 1.27 | 0.79 | 5.5  | 4.37  | 23.93 | 4.65  |
| 387 | M | 25 | 175 | 96    | 31.3 | 115 | 78  | 5.17 | 0.66 | 3.35 | 4.25 | 10.5 | 14.44 | 13.8  | 8.86  |
| 388 | M | 29 | 173 | 109   | 36.4 | 148 | 95  | 4.69 | 3.34 | 0.91 | 3.73 | 6.1  | 5.95  | 38.14 | 10.09 |
| 389 | F | 26 | 155 | 72    | 30.0 | 115 | 84  | 4.08 | 2.72 | 1.03 | 1.39 | 5.5  | 4.78  | 16.62 | 3.53  |
| 390 | F | 26 | 163 | 107.8 | 40.8 | 133 | 67  | 6.06 | 4.38 | 1.01 | 2.09 | 6.2  | 6.54  | 38.2  | 11.10 |
| 391 | M | 23 | 179 | 126.6 | 39.7 | 138 | 102 | 8.74 | 5.98 | 1.28 | 2.69 | 6.2  | 5.47  | 42.09 | 10.23 |
|     |   |    |     |       |      |     |     | 12.0 |      |      | 63.1 |      |       |       |       |
| 392 | M | 33 | 170 | 80    | 27.7 | 165 | 114 | 9    | 7.2  | 0.53 | 5    | 9.2  | 14.79 | 36.26 | 23.83 |
| 393 | F | 29 | 150 | 76    | 33.8 | 124 | 79  | 6.03 | 3.97 | 1.06 | 2.11 | 5.5  | 5.45  | 22.24 | 5.39  |
| 394 | F | 24 | 165 | 112.8 | 41.4 | 126 | 78  | 5.06 | 3.44 | 1.08 | 1.23 | 5.8  | 5.7   | 162.5 | 41.17 |
| 395 | F | 46 | 158 | 120.1 | 48.1 |     |     | 6.28 | 3.88 | 1.26 | 2.39 | 7    | 6.93  | 20.21 | 6.22  |
| 396 | F | 36 | 168 | 94.2  | 33.4 | 141 | 76  | 5.46 | 3.49 | 0.96 | 3.38 | 7    | 7.5   | 130.6 | 43.53 |
| 397 | M | 27 | 168 | 97    | 34.4 | 146 | 82  | 4.63 | 2.9  | 1.04 | 2.65 | 5.4  | 5.16  | 22.67 | 5.20  |
| 398 | M | 19 | 172 | 91.8  | 31.0 | 133 | 67  | 5.8  | 4.06 | 0.89 | 1.33 | 6.5  | 5.44  | 55.56 | 13.43 |
| 399 | F | 19 | 170 | 100   | 34.6 | 138 | 102 | 6.03 | 3.92 | 1.46 | 1.41 | 5.2  | 5.12  | 29.85 | 6.79  |
| 400 | F | 20 | 158 | 77    | 30.8 | 165 | 114 | 4.36 | 2.95 | 1.22 | 0.7  | 5.7  | 5.68  | 21.45 | 5.41  |
| 401 | F | 19 | 161 | 72.3  | 28.1 |     |     | 3.73 | 2.51 | 1    | 1.04 | 5    | 4.76  | 12.67 | 2.68  |
| 402 | F | 38 | 166 | 96.1  | 34.9 |     |     | 5.3  | 3.53 | 1.09 | 1.54 | 6    | 5.46  | 8.9   | 2.16  |
| 403 | F | 25 | 160 | 83.4  | 32.6 |     |     |      | 1    | 4.1  | 7.13 | 5.8  | 6.84  | 36.14 | 10.99 |
| 404 | F | 42 | 160 | 69    | 27.0 |     |     | 6.12 | 4.16 | 1.18 | 2.71 | 5.5  | 5.2   | 18.44 | 4.26  |
| 405 | F | 59 | 160 | 99.8  | 39.0 | 144 | 71  | 3.71 | 2.39 | 1.06 | 1.64 | 6.3  | 5.62  | 25.32 | 6.32  |
| 406 | F | 18 | 165 | 87.6  | 32.2 |     |     | 5.28 | 3.37 | 1.17 | 1.76 | 5.5  | 5.43  | 16.93 | 4.09  |
| 407 | F | 26 | 159 | 73.7  | 29.2 | 119 | 71  | 4.78 | 3.08 | 1.27 | 2.15 | 5.5  | 5.2   | 30.96 | 7.16  |
| 408 | F | 36 | 152 | 72.7  | 31.5 | 159 | 97  | 4.04 | 2.56 | 1.09 | 1.27 | 5.6  | 5.3   | 13.13 | 3.09  |
| 409 | F | 21 | 157 | 77    | 31.2 | 124 | 77  | 5.94 | 3.88 | 1.08 | 3.01 | 5.2  | 5.49  | 20.38 | 4.97  |
| 410 | F | 18 | 168 | 84.2  | 29.8 | 147 | 90  | 2.96 | 1.84 | 0.74 | 1.61 | 5.1  | 4.73  | 24.03 | 5.05  |
| 411 | M | 22 | 181 | 111.8 | 34.1 |     |     | 5.3  | 3.78 | 1.03 | 1.68 | 5.2  | 4.78  | 49.09 | 10.43 |
| 412 | M | 38 | 165 | 133   | 48.9 |     |     | 5.88 | 3.97 | 1.12 | 1.57 | 7.9  | 8.84  | 37.72 | 14.82 |

|     |   |    |     |       |      |     |     |      |      |      |      |      |      |       |       |
|-----|---|----|-----|-------|------|-----|-----|------|------|------|------|------|------|-------|-------|
| 413 | F | 27 | 163 | 109.5 | 41.5 | 121 | 88  | 3.79 | 2.37 | 1.38 | 0.9  | 5.2  | 4.71 | 26.36 | 5.52  |
| 414 | F | 23 | 161 | 84.9  | 32.8 | 109 | 74  | 6.66 | 4.36 | 1.13 | 4.93 | 6.3  | 7.19 | 43.01 | 13.74 |
| 415 | M | 18 | 183 | 97.3  | 29.1 | 114 | 67  | 3.14 | 1.02 | 1.97 | 0.68 | 5    | 5.09 |       |       |
| 416 | M | 26 | 172 | 106.6 | 36.0 | 134 | 78  | 5.65 | 3.86 | 1.03 | 2.61 | 5.7  | 4.89 | 25.14 | 5.46  |
| 417 | M | 24 | 178 | 115   | 36.5 | 122 | 71  | 3.78 | 2.58 | 0.85 | 1.77 | 5.9  | 5.15 | 24.8  | 5.68  |
| 418 | F | 42 | 157 | 87.7  | 35.6 | 139 | 81  | 4.59 | 2.97 | 1.24 | 2.04 | 5.8  | 5.05 | 48.36 | 10.85 |
| 419 | F | 35 | 150 | 88.7  | 39.7 |     |     | 5.17 | 3.29 | 1.46 | 1.4  | 5.15 | 4.82 | 28.11 | 6.02  |
| 420 | M | 25 | 173 | 95.2  | 31.8 |     |     | 7.91 | 5.47 | 1.48 | 1.38 | 9.8  | 8.2  | 21.27 | 7.75  |
| 421 | F | 34 | 157 | 84.7  | 34.6 |     |     | 4.74 | 2.64 | 1.66 | 1.08 | 5.3  | 5.13 | 33.21 | 7.57  |
| 422 | F | 24 | 158 | 93    | 37.3 |     |     | 5.23 | 3.41 | 1.31 | 1    | 4.8  | 4.76 | 24.63 | 5.21  |
| 423 | F | 22 | 167 | 127.6 | 45.8 |     |     | 5.17 | 3.41 | 1.05 | 2.14 | 5.3  | 4.81 | 40.63 | 8.69  |
| 424 | M | 42 | 179 | 103   | 32.1 | 138 | 82  | 5.37 | 1.01 | 3.61 | 2.08 | 5.8  | 5.75 | 42.42 | 10.84 |
| 425 | M | 26 | 175 | 112.9 | 36.9 |     |     | 4.91 | 3.01 | 1.1  | 2.45 | 5.1  | 5.57 | 31.29 | 7.75  |
| 426 | F | 34 | 160 | 78.8  | 30.8 | 133 | 67  | 6.74 | 4.91 | 0.97 | 1.46 | 5.04 | 5.04 | 27.6  | 6.18  |
| 427 | M | 21 | 174 | 119.7 | 39.5 | 138 | 102 | 5.19 | 3.54 | 1.12 | 1.39 | 5.1  | 4.58 | 29.76 | 6.06  |
| 428 | M | 29 | 179 | 139   | 43.4 | 165 | 114 | 4.54 | 3.17 | 0.96 | 1.76 | 7.3  | 6.78 | 31.12 | 9.38  |
| 429 | M | 18 | 172 | 89    | 30.3 |     |     | 3.98 | 2.26 | 1.4  | 0.91 | 5.6  | 5.04 | 25.69 | 5.75  |
| 430 | M | 24 | 176 | 107   | 34.7 | 134 | 83  | 5.47 | 3.87 | 0.91 | 1.19 | 5.2  | 5.4  | 33.34 | 8.00  |
| 431 | F | 24 | 156 | 95.8  | 39.4 | 143 | 91  | 4.41 | 2.76 | 1.08 | 2.12 | 5.5  | 5.26 | 57.51 | 13.44 |
| 432 | F | 33 | 158 | 80.8  | 32.6 |     |     | 3.92 | 2.56 | 1    | 1.11 | 5.4  | 5.77 | 25.25 | 6.48  |
| 433 | F | 49 | 167 | 80.9  | 29.0 |     |     | 5.89 | 3.68 | 1.69 | 1.39 | 5.8  | 4.66 | 16.18 | 3.35  |
| 434 | F | 31 | 160 | 65    | 25.4 |     |     | 5.8  | 1.91 | 3.28 | 0.83 |      | 4.5  | 38.29 | 7.66  |
| 435 | F | 25 | 161 | 88    | 33.9 |     |     | 5.78 | 1.27 | 3.95 | 1.38 | 5.4  | 5.31 | 22.05 | 5.20  |
| 436 | F | 23 | 164 | 121.5 | 45.2 | 168 | 101 | 3.65 | 2.3  | 1.08 | 0.98 | 7.1  | 6.56 | 45.27 | 13.20 |
| 437 | F | 36 | 163 | 71.4  | 26.9 |     |     | 5.08 | 3.35 | 1.06 | 2.97 | 5    | 4.99 | 18.55 | 4.11  |
| 438 | M | 26 | 166 | 113   | 41.0 |     |     | 4.57 | 2.96 | 0.88 | 2.73 | 5.7  | 4.84 | 20.47 | 4.40  |
| 439 | F | 26 | 165 | 86    | 31.6 |     |     | 4.86 | 1.42 | 2.99 | 1.66 | 5.3  | 4.83 | 20.16 | 4.33  |
| 440 | M | 28 | 176 | 118.5 | 38.3 |     |     | 3.84 | 2.47 | 0.98 | 1.73 | 4.9  | 5.12 | 48.8  | 11.10 |
| 441 | M | 22 | 176 | 103.5 | 33.6 | 121 | 88  | 4.6  | 2.98 | 1.12 | 0.94 | 4.8  | 5.31 |       |       |
| 442 | F | 36 | 157 | 60.9  | 24.7 | 109 | 74  | 5.14 | 2.84 | 1.44 | 1.36 | 4.9  | 5.7  | 42.4  | 10.74 |
| 443 | F | 20 | 165 | 92    | 34.0 | 114 | 67  | 4.32 | 2.84 | 1.12 | 1.33 | 5.4  | 4.81 | 28.34 | 6.06  |
| 444 | F | 28 | 161 | 80    | 30.9 | 134 | 78  | 6.57 | 4.47 | 1.7  | 0.76 | 5.4  | 4.93 | 15.94 | 3.49  |
| 445 | F | 31 | 167 | 94.6  | 33.9 | 122 | 71  | 4.85 | 3.16 | 0.98 | 1.9  |      | 4.93 | 11.66 | 2.55  |
| 446 | M | 27 | 181 | 122.9 | 37.5 | 139 | 81  | 4.69 | 3.19 | 0.93 | 2.79 | 6    | 5.43 | 45.21 | 10.91 |
| 447 | M | 19 | 176 | 138.4 | 44.9 |     |     | 4.93 | 3.36 | 1.15 | 0.91 | 5.4  | 5.71 | 42.3  | 10.73 |

Abbreviations: SBP, systolic blood pressure; DBP, diastolic blood pressure; HDL-C, HDL cholesterol; LDL-C, LDL cholesterol; FBG, fasting blood glucose; FINS, fasting insulin; HOMA-IR, HOMA-insulin resistance.

**Table S2: Summary of attribute values of participants.**

| Variable               | Mean      | SD   | Median | Minimal | Maximal | Max/<br>min | No. of<br>missing<br>values | No. of<br>abnormal<br>values | Reference<br>range |
|------------------------|-----------|------|--------|---------|---------|-------------|-----------------------------|------------------------------|--------------------|
| Number                 | 447       |      |        |         |         |             |                             |                              |                    |
| Male (%)               | 166 (37%) |      |        |         |         |             |                             |                              |                    |
| Age                    | 30.9      | 9.1  | 30     | 18      | 71      | 3.9         | –                           | –                            | –                  |
| BMI, kg/m <sup>2</sup> | 33.4      | 5.1  | 32.4   | 24.6    | 55.1    | 2.2         | –                           | 447                          | <24                |
| SBP, mmHg              | 131.8     | 15.2 | 129.5  | 100     | 188     | 1.88        | 35                          | 95                           | <140               |
| DBP, mmHg              | 83.7      | 12.1 | 82.0   | 53      | 133     | 2.5         | 35                          | 119                          | <90                |
| TC, mmol/L             | 5.20      | 1.00 | 5.15   | 2.39    | 12.09   | 3.6         | 25                          | 199                          | <5.2               |
| HDL-C, mmol/L          | 1.65      | 0.99 | 1.21   | 0.61    | 7.20    | 9.8         | 22                          | 147                          | >1.1               |
| LDL-C, mmol/L          | 2.81      | 1.05 | 3.00   | 0.53    | 5.49    | 7.4         | 24                          | 186                          | <3.12              |
| TG, mmol/L             | 2.00      | 3.20 | 1.62   | 0.42    | 63.53   | 29.6        | 23                          | 190                          | <1.7               |
| FBG, mmol/L            | 5.78      | 1.44 | 5.42   | 3.72    | 17.70   | 4.8         | 8                           | 46                           | <7                 |
| HOMA-IR                | 7.22      | 5.30 | 5.74   | 0.71    | 43.53   | 61.3        | 25                          | 393                          | <3.5               |
| HbA1c                  | 5.75      | 1.00 | 5.50   | 4.40    | 12.60   | 2.9         | 36                          | 51                           | <6.5               |

Abbreviations: CI, confidence interval; SD, standard deviation; SBP, systolic blood pressure; TC, total cholesterol; HDL-C, HDL cholesterol; LDL-C, LDL cholesterol; TG, triglyceride; FBG, fasting blood glucose; HOMA-IR, HOMA-insulin resistance.

### Method S3: R computer language scripts

```
####Load libraries and excel format obesity data set
#Sys.setenv(JAVA_HOME='C:/Program Files (x86)/Java/jre1.8.0_191')
library(openxlsx)
library(ggplot2)
library("VIM")
library(psych)
```

```

library(factoextra)
options(digits=5,expressions=100000,width=160)
setwd(data_directory) #Set the directory where data are loaded

originaldata<-read.xlsx("obesitydata.xlsx")
print(summary(originaldata))

##### Create quantile-transformed data based on a selected attribute
attribute<-originaldata[,13] # Select systolic blood pressure, other attributes can be selected
similarly
ma<-matrix(4,ncol=2) ## Specify 4 quantiles, also 10 quantiles can be calculated similarly
for (i in 1:4) {
quant<-quantile(attribute,c(1/4*(i-1),1/4*i))
ma[i,1]<-quant[[1]]
ma[i,2]<-quant[[2]]
}

oneframe<-data.frame(attribute,attribute)
for (i in 1:4) {
oneframe[,1][which(oneframe[,2]>=ma[i,1]& oneframe[,2]<=ma[i,2] &
is.na(oneframe[,2])!=FALSE)]<-i } #Designate one of the attribute values as sequential quantiles

oneframe<-oneframe[,-2] #Remove the redundant part of the original attribute value
oneframe<-as.data.frame(oneframe)
names(oneframe)<-paste(names(originaldata[3]),"_quantiled",sep="") #Specify the name of the
quantiled attribute #Name the quantiled attribute
originaldata<-cbind(originaldata,oneframe) #Added the quantiled attribute to the original data set
print(summary(usedata))

#####CLUSTERING
clusdata<-originaldata[,c(13,16,17,18,19,21,24)] #Select attributes
print(summary(clusdata))
scaleddata <- scale(clusdata)

res.km <- eclust(scaleddata, "kmeans", nboot = 500) # Calculate K-means centroids
print(fviz_gap_stat(res.km$gap_stat)) #Plot the graph to determine the optimal number of clusters.
(Figure 3 in the paper)
clusnmb<-6 # Specify the optimal number of clusters
set.seed(123)
km_result <- kmeans(scaleddata, clusnmb, nstart = 24)

print(fviz_cluster(km_result, data = scaleddata, #Figure 4, Figure 6, Figure 7 can be obtained
similarly using different data set such as quantiled or original data

```

```
stand=TRUE,  
show.clust.cent=TRUE,  
palette = "jco",  
geom="point",  
ellipse=TRUE,  
ellipse.type = "norm",  
ellipse.level=0.95,  
ggtheme = theme_minimal(),  
main= "Partitioning Clustering Plot"  
)
```

```
print(fviz_cluster(km_result, data = scaleddata, #Figure 5  
stand=TRUE,  
show.clust.cent=TRUE,  
palette = "jco",  
geom="point",  
ellipse=TRUE,  
ellipse.type = "norm",  
ellipse.level=0.68,  
ggtheme = theme_minimal(),  
main= "Partitioning Clustering Plot"  
)
```
